# Supplementary material
Source: PubMed Central journal article supplement (PMC3805113)
Supplement: NIHMS510551-supplement-01.pdf [file NIHMS510551-supplement-01.pdf]

Supplemental material:  
 Representative data of linear regression analysis for PKC isoform quantitation

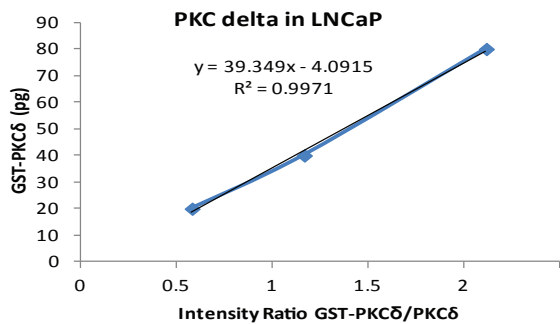

x=1, y=35.257pg, 20ng lysate  
 MW GST-PKC delta:104; PKC delta:77.5  
 26.273 pg in 20 ng Lysate, 1.314 pg/ng lysate

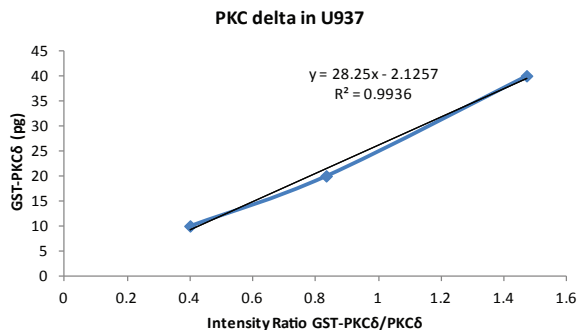

x=1, y=26.124pg, 10 ng lysate  
 MW GST-PKC delta:104; PKC delta:77.5  
 19.467 pg in 10 ng Lysate, 1.947 pg/ng lysate

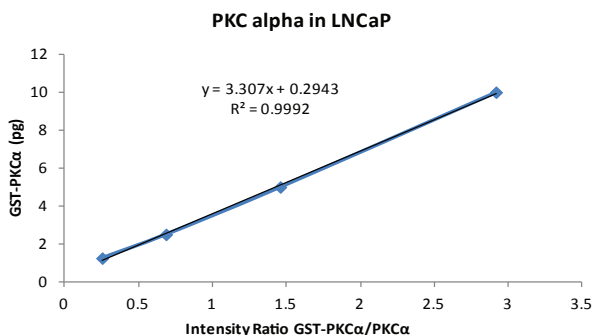

x=1, y=3.601pg, 40 ng lysate  
 MW GST-PKC alpha:103; PKC delta:76.8  
 2.685 pg in 40 ng Lysate, 0.067 pg/ng lysate

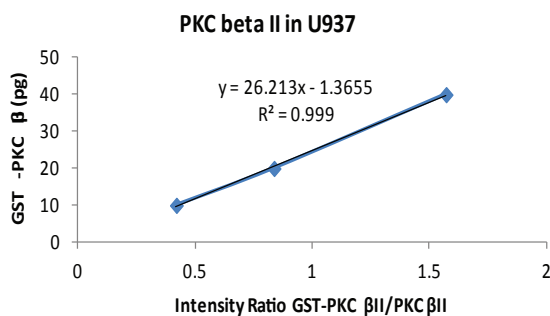

x=1, y=24.848pg, 20ng lysate  
 MW GST-PKC beta II:105; PKC beta II: 77  
 18.222 pg in 20 ng Lysate, 0.911 pg/ng lysate

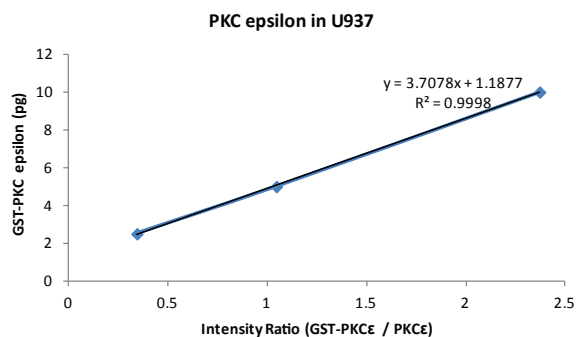

x=1, y=4.895pg, 88ng lysate  
 MW GST-PKC epsilon:110; PKC epsilon: 83.6  
 3.720 pg in 88 ng Lysate, 0.042 pg/ng lysate

**Supplemental Table:** PKC isoform quantitation in LNCaP and U937 cells

| <b>Protein</b> | <b>Lysate</b> | <b>Run#</b> | <b>pg / ng<br/>Lysate</b> | <b>Mean</b> | <b>SD</b> | <b>%CV</b> |
|----------------|---------------|-------------|---------------------------|-------------|-----------|------------|
| PKC alpha      | LNCaP         | Run1        | 0.064                     |             |           |            |
| PKC alpha      | LNCaP         | Run2        | 0.067                     | 0.064       | 0.003     | 4.7%       |
| PKC alpha      | LNCaP         | Run3        | 0.061                     |             |           |            |
| PKC alpha      | U937          | Run1        | <0.009                    |             |           |            |
| PKC alpha      | U937          | Run2        | <0.009                    | <0.009      | N/A       | N/A        |
| PKC alpha      | U937          | Run3        | <0.009                    |             |           |            |
| PKC beta II    | U937          | Run1        | 0.835                     |             |           |            |
| PKC beta II    | U937          | Run2        | 1.175                     | 0.974       | 0.178     | 18.3%      |
| PKC beta II    | U937          | Run3        | 0.911                     |             |           |            |
| PKC beta II    | LNCaP         | Run1        | < 0.062                   |             |           |            |
| PKC beta II    | LNCaP         | Run2        | < 0.030                   | < 0.062     | N/A       | N/A        |
| PKC beta II    | LNCaP         | Run3        | < 0.062                   |             |           |            |
| PKC delta      | LNCaP         | Run1        | 1.314                     |             |           |            |
| PKC delta      | LNCaP         | Run2        | 1.071                     | 1.314       | 0.175     | 13.3%      |
| PKC delta      | LNCaP         | Run3        | 1.395                     |             |           |            |
| PKC delta      | LNCaP         | Run4        | 1.475                     |             |           |            |
| PKC delta      | U937          | Run1        | 2.050                     |             |           |            |
| PKC delta      | U937          | Run2        | 1.730                     | 1.909       | 0.163     | 8.6%       |
| PKC delta      | U937          | Run3        | 1.947                     |             |           |            |
| PKC epsilon    | U937          | Run1        | 0.043                     |             |           |            |
| PKC epsilon    | U937          | Run2        | 0.043                     | 0.043       | 0.001     | 2.9%       |
| PKC epsilon    | U937          | Run3        | 0.045                     |             |           |            |
| PKC epsilon    | U937          | Run4        | 0.042                     |             |           |            |
| PKC epsilon    | LNCaP         | Run1        | ≤0.022                    |             |           |            |
| PKC epsilon    | LNCaP         | Run2        | ≤0.032                    | ≤0.032      | N/A       | N/A        |
| PKC epsilon    | LNCaP         | Run3        | <0.032                    |             |           |            |
